# Supplementary material
Source: Springer Nature journal article supplement (https://www.springermedizin.de/resource/supplementary/12936_2014_3326_MOESM8_ESM.pdf/9545666)
Supplement: MOESM8 [file 9545666]

|     |     |     |     |      |      |     |     |     |
|-----|-----|-----|-----|------|------|-----|-----|-----|
| 0.5 | 0.5 | 0.3 | 8.4 | 18.4 | 12.4 | 5.8 | 1.8 | 9.3 |
|-----|-----|-----|-----|------|------|-----|-----|-----|

|     |     |     |
|-----|-----|-----|
| 2.3 | 1.1 | 0.6 |
| 0.3 | 0.6 | 1.8 |
| 0.8 | 0.3 | 2.6 |

67.8
